# Supplementary material for: Optimization of fermentation conditions and enzymatic properties of extracellular lipase produced by Serratia marcescens derived from food waste
Source: Research Square preprint supplement (doi:10.21203/rs.3.rs-7922278/v1), 2025-11-14
Supplement: Supplementary file 1 [file 188891d6e3d66f4ffc2aaf4d.docx]

**Supplementary Materials**

Table 1 Plackett-Burman design factor levels and coding values

| Coding level | A: Glucose（g/L） | B:  Beef extract（g/L） | C:  Olive oil（g/L） | D:  KH2PO4（g/L） | E:  pH | F:  Temperature（℃） | G:  Time  （h） | H：  Inoculum size  （%） |
| --- | --- | --- | --- | --- | --- | --- | --- | --- |
| High（+1） | 8 | 6 | 1 | 2 | 5 | 29 | 36 | 5 |
| Low（-1） | 4 | 3 | 0.5 | 0.2 | 6 | 26 | 24 | 1 |

Table 2 Factor levels of RSM-CCD

| **Variable** | Code | **Actual values** | | | | |
| --- | --- | --- | --- | --- | --- | --- |
| -2 | -1 | 0 | 1 | 2 |
| Beef extract（g/L）  Inoculum size（%）  Time（h） | A  B  C | 3  1  24 | 3.6  1.8  26.4 | 4.5  3  30 | 5.4  4.2  33.6 | 6  5  36 |

Table 3 Plackett-Burman test design and results

| Num | A: Glucose  (g/L) | B: Beef extract  (g/L) | C: Olive oil  （%） | D: KH2PO4  (g/L) | E:  pH | F: Temperature（℃） | G:  Time  （h） | H:  Inoculum size  （%） | Enzyme  Activity  （U/mL） |
| --- | --- | --- | --- | --- | --- | --- | --- | --- | --- |
| 1 | 1 | 1 | -1 | 1 | -1 | 1 | -1 | -1 | 394.558±20.99 |
| 2 | -1 | 1 | 1 | -1 | -1 | 1 | 1 | -1 | 280.851±12.89 |
| 3 | 1 | -1 | 1 | 1 | 1 | 1 | 1 | 1 | 94.648 7±6.02 |
| 4 | -1 | 1 | -1 | 1 | -1 | -1 | 1 | 1 | 407.539±17.62 |
| 5 | -1 | -1 | 1 | -1 | -1 | 1 | -1 | 1 | 374.235±18.75 |
| 6 | -1 | -1 | -1 | 1 | 1 | 1 | 1 | -1 | 99.3943±8.01 |
| 7 | 1 | -1 | -1 | -1 | -1 | -1 | 1 | 1 | 92.1223±4.46 |
| 8 | 1 | 1 | -1 | -1 | 1 | 1 | -1 | 1 | 347.619±9.99 |
| 9 | 1 | 1 | 1 | -1 | 1 | -1 | 1 | -1 | 83.6227±8.58 |
| 10 | -1 | 1 | 1 | 1 | 1 | -1 | -1 | 1 | 389.439±22.56 |
| 11 | 1 | -1 | 1 | 1 | -1 | -1 | -1 | -1 | 117.771±7.83 |
| 12 | -1 | -1 | -1 | -1 | 1 | -1 | -1 | -1 | 102.495±8.67 |

Tabelle 4: Versuchsaufbau und Ergebnisse von RSM-CCD

| Num | A: Beef extract  (g/L) | B:  Time  （h） | C:  Inoculum size  （%） | Enzyme  Activity  （U/mL） |
| --- | --- | --- | --- | --- |
| 1 | -1 | -1 | -1 | 288.01±5..95 |
| 2 | 1 | -1 | -1 | 399.01±7.06 |
| 3 | -1 | 1 | -1 | 618.06±2.59 |
| 4 | 1 | 1 | -1 | 435.52±8.71 |
| 5 | -1 | -1 | 1 | 336.45±2.82 |
| 6 | 1 | -1 | 1 | 535.16±1.45 |
| 7 | -1 | 1 | 1 | 451.44±6.05 |
| 8 | 1 | -1 | 1 | 388.86±5.84 |
| 9 | -2 | 0 | 0 | 473.78±9.28 |
| 10 | 2 | 0 | 0 | 500.59±3.38 |
| 11 | 0 | -2 | 0 | 377.86±2.42 |
| 12 | 0 | -2 | 0 | 526.50±8.08 |
| 13 | 0 | 0 | -2 | 367.69±4.53 |
| 14 | 0 | 0 | 2 | 355.98±11.99 |
| 15 | 0 | 0 | 0 | 493.23±16.08 |
| 16 | 0 | 0 | 0 | 495.27±16.47 |
| 17 | 0 | 0 | 0 | 502.18±23.55 |
| 18 | 0 | 0 | 0 | 539.77±21.88 |
| 19 | 0 | 0 | 0 | 495.55±19.46 |
| 20 | 0 | 0 | 0 | 501.17±76.01 |
| 21 | 0 | 0 | 0 | 519.87±19.81 |
| 22 | 0 | 0 | 0 | 456.94±20.69 |
| 23 | 0 | 0 | 0 | 501.55±18.92 |

| Source | Sum of squares | df | Mean square | ***F* value** | ***p* value** |  |
| --- | --- | --- | --- | --- | --- | --- |
| Model | 1.319E+05 | 9 | 14660.93 | 46.68 | < 0.0001 | significant |
| A-Beef Extract | 880.80 | 1 | 880.80 | 2.80 | 0.1179 |  |
| B-Inoculum size | 25078.47 | 1 | 25078.47 | 79.85 | < 0.0001 |  |
| C-Time | 171.25 | 1 | 171.25 | 0.5453 | 0.4734 |  |
| AB | 38479.40 | 1 | 38479.40 | 122.53 | < 0.0001 |  |
| AC | 5390.59 | 1 | 5390.59 | 17.16 | 0.0012 |  |
| BC | 19786.08 | 1 | 19786.08 | 63.00 | < 0.0001 |  |
| A2 | 301.57 | 1 | 301.57 | 0.960 | 0.3450 |  |
| B2 | 4448.83 | 1 | 4448.83 | 14.17 | 0.0024 |  |
| C2 | 37647.32 | 1 | 37647.32 | 119.88 | < 0.0001 |  |
| **Residual** | 4082.65 | 13 | 314.05 |  |  |  |
| Lack of Fit | 158.70 | 5 | 31.74 | 0.0647 | 0.9960 | not significant |  |
| Pure Error | 3923.95 | 8 | 490.49 |  |  |  |
| *R2* | 0.97 |  | *Adjusted R²* | 0.9492 | *CV* (%) | 5.57 |

Y=500.57+8.03A+42.85B−3.54C−69.35AB+25.95AC−49.73BC−4.35A2−16.73B2−48.67C2
